# Supplementary material for: A predicted functional gene network for the plant pathogen Phytophthora infestans as a framework for genomic biology
Source: PubMed Central journal article supplement (PMC3734169; doi:10.1186/1471-2164-14-483), 2013-07-17
Supplement: 1471-2164-14-483-S2.pdf [file 1471-2164-14-483-S2.pdf]

**A**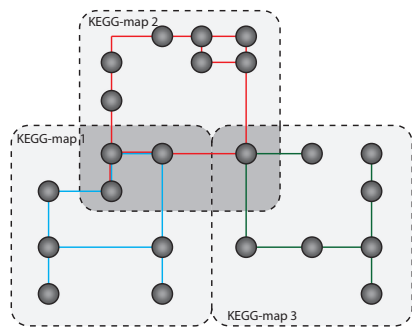

Level 1

biological process

Level 2

cellular process

metabolic process

Level 3

cellular metabolic process

small molecule metabolic process

oxidation-reduction process

Level 4

cellular ketone metabolic process

organic acid metabolic process

Level 5

oxoacid metabolic process

Level 6

carboxylic acid metabolic process

Level 7

dicarboxylic acid metabolic process

cellular amino acid metabolic process

carboxylic acid biosynthetic process

Level 8

malate metabolic process

cellular modified amino acid metabolic process

cellular amino acid biosynthetic process

Level 9

pantothenate metabolic process

cellular modified amino acid biosynthetic process

Level 10

pantothenate biosynthetic process

**B**

KEGG

GO<sub>bp</sub> ≥ 6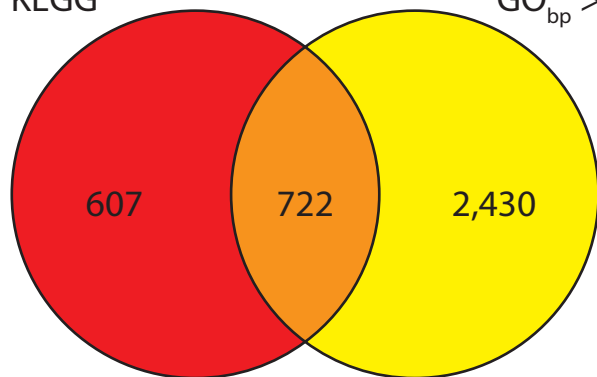

Proteins

**C**

KEGG

GO<sub>bp</sub> ≥ 6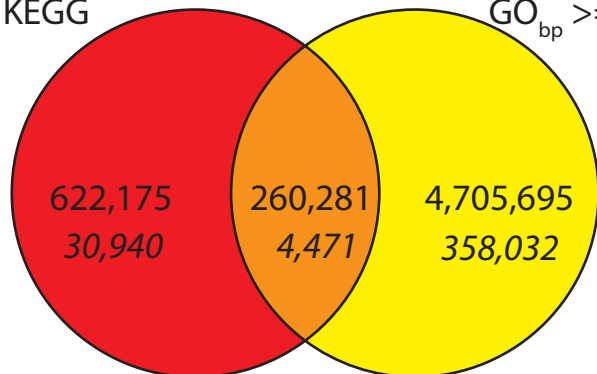All pairs  
positive pairs
