# Supplementary material for: A predicted functional gene network for the plant pathogen Phytophthora infestans as a framework for genomic biology
Source: PubMed Central journal article supplement (PMC3734169; doi:10.1186/1471-2164-14-483), 2013-07-17

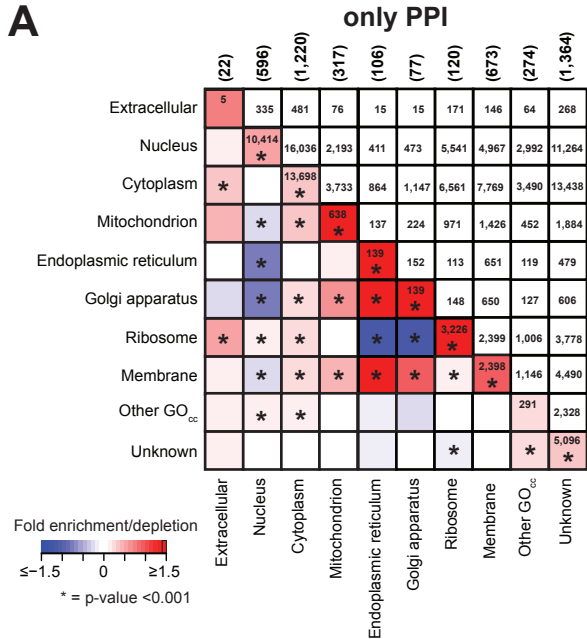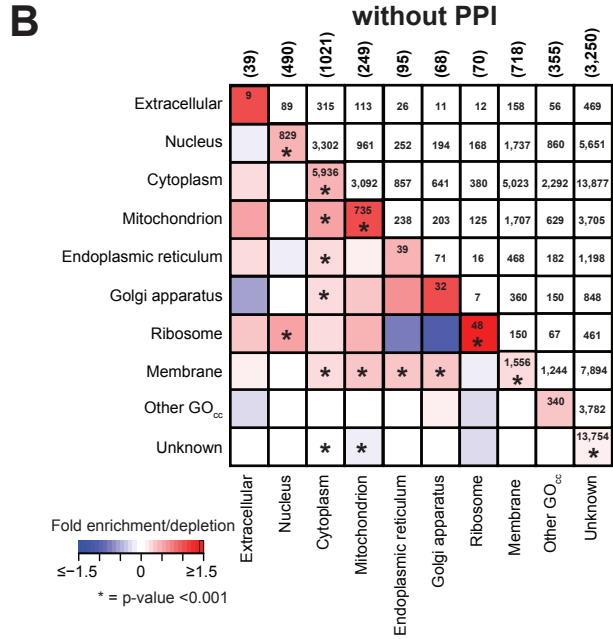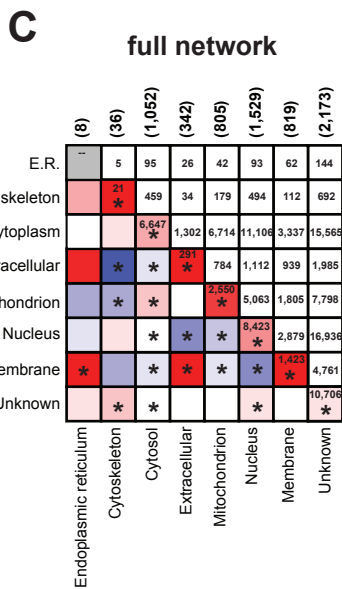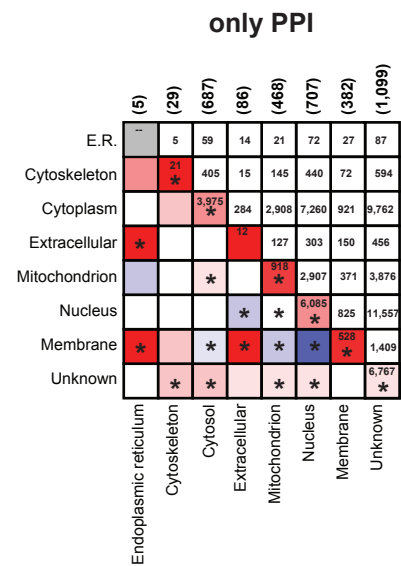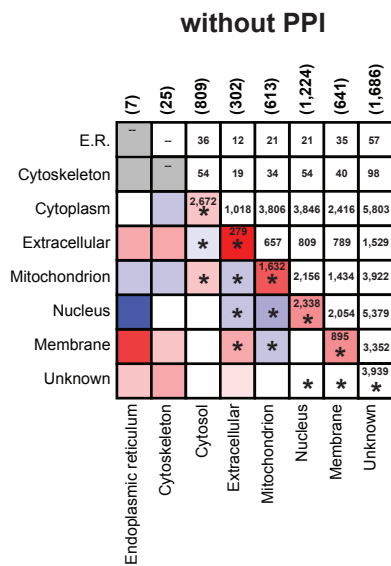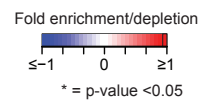

Supplement: 1471-2164-14-483-S4.pdf [file 1471-2164-14-483-S4.pdf]
