# Supplementary material for: A predicted functional gene network for the plant pathogen Phytophthora infestans as a framework for genomic biology
Source: PubMed Central journal article supplement (PMC3734169; doi:10.1186/1471-2164-14-483), 2013-07-17

**A** best fit:  $0.001309 * \exp(7.87693 * x)$

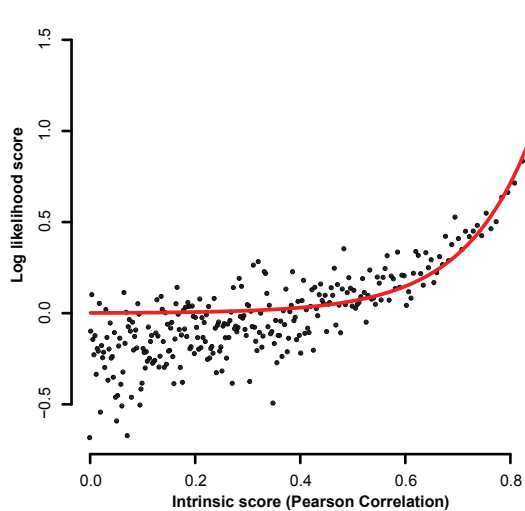

**B** best fit:  $0.006419 * \exp(6.5814 * x)$

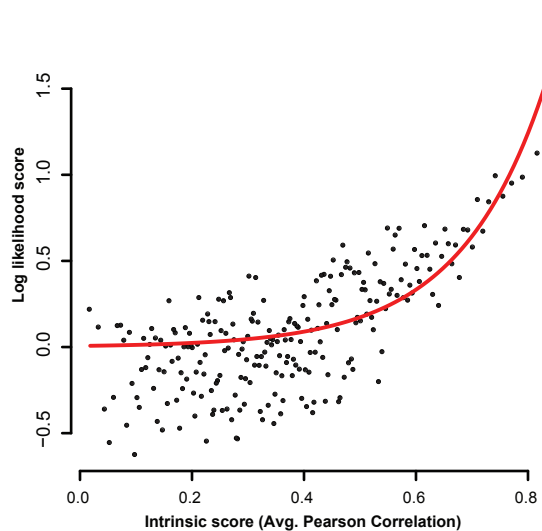

**C** best fit:  $1.21 / (1 + \exp(6.76 - (10.94 * x)))$

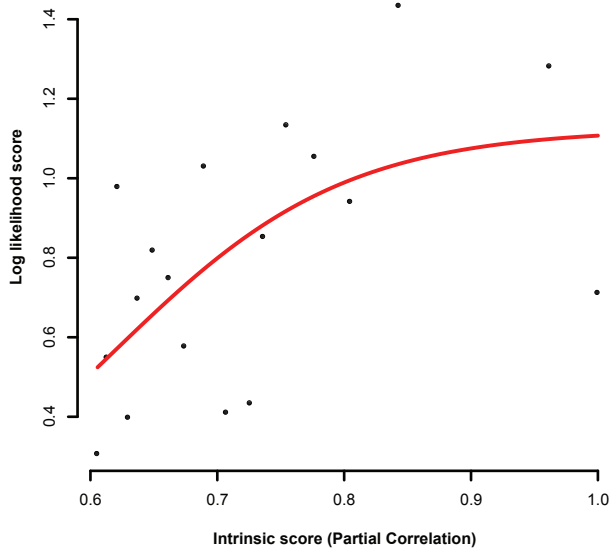

Supplement: 1471-2164-14-483-S7.pdf [file 1471-2164-14-483-S7.pdf]
